# Supplementary material
Source: PubMed Central journal article supplement (PMC3417231)
Supplement: NIHMS395344-supplement-supp_info1.pdf [file NIHMS395344-supplement-supp_info1.pdf]

## Supplementary Movies

### **Movies S1 and S2**

Movies demonstrating *in vivo* (movie S1) and *in situ* under open surgery (movie S2) real-time multicolor fluorescence lymphatic imaging. Each lymph node can be identified by its distinct color.
