# Supplementary material
Source: PubMed Central journal article supplement (PMC3417231)
Supplement: NIHMS395344-supplement-supp_info2.pdf [file NIHMS395344-supplement-supp_info2.pdf]

## Supplementary Materials

### *In vivo* Real-Time, Multicolor, Quantum Dot Lymphatic Imaging

Nobuyuki Kosaka, Mikako Ogawa, Noriko Sato, Peter L. Choyke, and  
Hisataka Kobayashi

Molecular Imaging Program, Center for Cancer Research, National Cancer  
Institute, National Institutes of Health, 10 Center Dr., Bethesda, MD  
20892-1088, USA

**\*Requests for reprints to:** Hisataka Kobayashi, M.D., Ph.D. Molecular  
Imaging Program, Center for Cancer Research, National Cancer Institute,  
NIH, Building 10, Room 1B40, MSC1088, Bethesda, MD 20892-1088. Phone:  
301-451-4220; Fax: 301-402-3191; E-mail: [kobayash@mail.nih.gov](mailto:kobayash@mail.nih.gov)

## Supplementary Figures

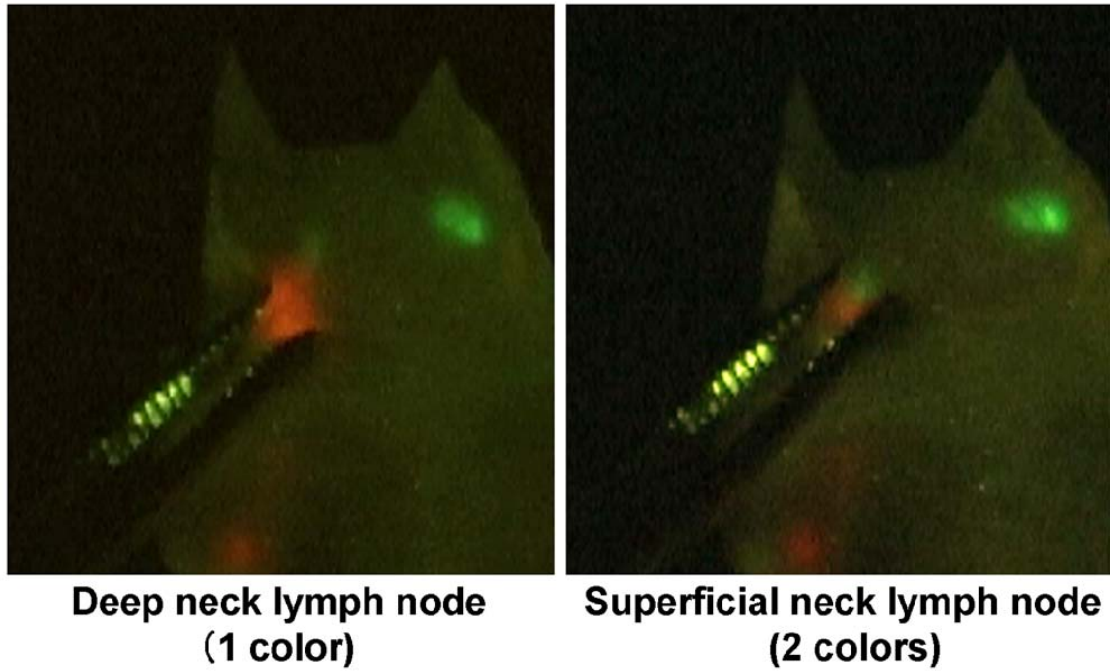

Figure S1

Capture images of right superficial and deep neck lymph nodes in Figure 2 from *in vivo* real-time video. Two-color co-existence become more obvious by picking up this lymph node in real-time *in vivo* imaging

**7 days after injection**

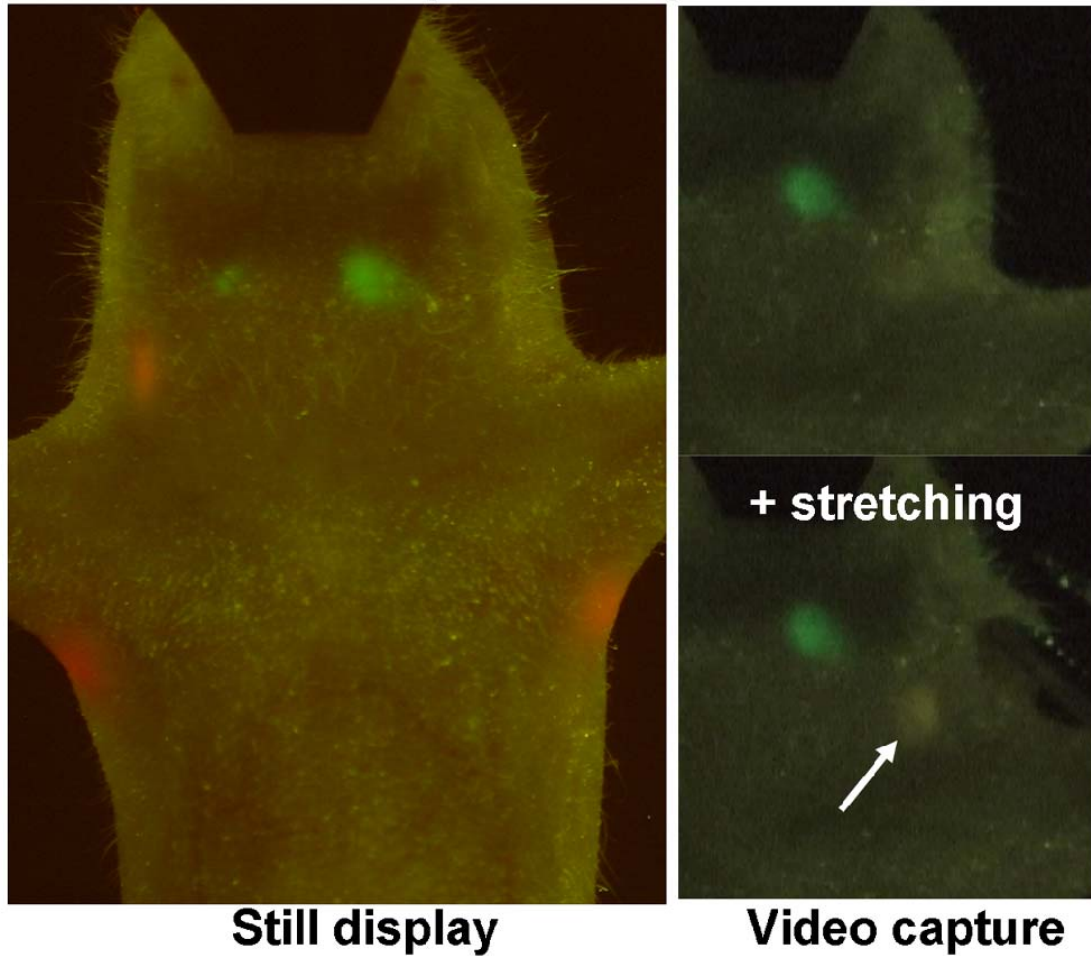

**Figure S2**

Still image and capture images at day 7 after injection in Figure 3. Although the left deep cervical lymph node containing Qdot565 emits faintly visible lights in the still display, yellow lights from Qdot565 can be detected by stretching a skin for increasing the light yield from the lymph node during a real-time observation.

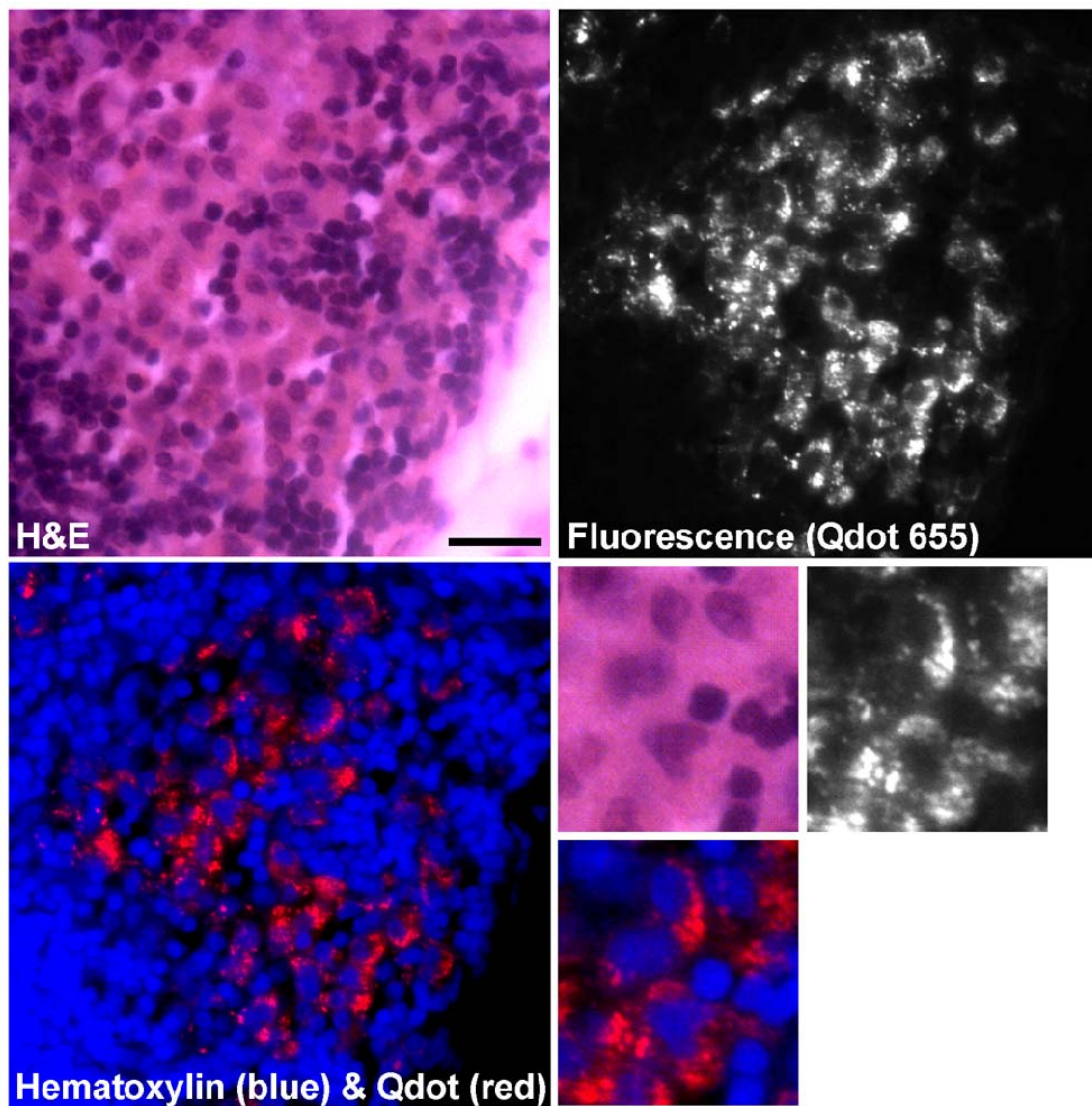

**Figure S3**

Microscopic images of H&E and Qdot 655, and composite images of hematoxylin (nucleus) and Qdot655 in right axillary lymph node. Composite microscopic images clearly show that Qdots locate in the cytoplasm. Scale bar = 25  $\mu\text{m}$ .



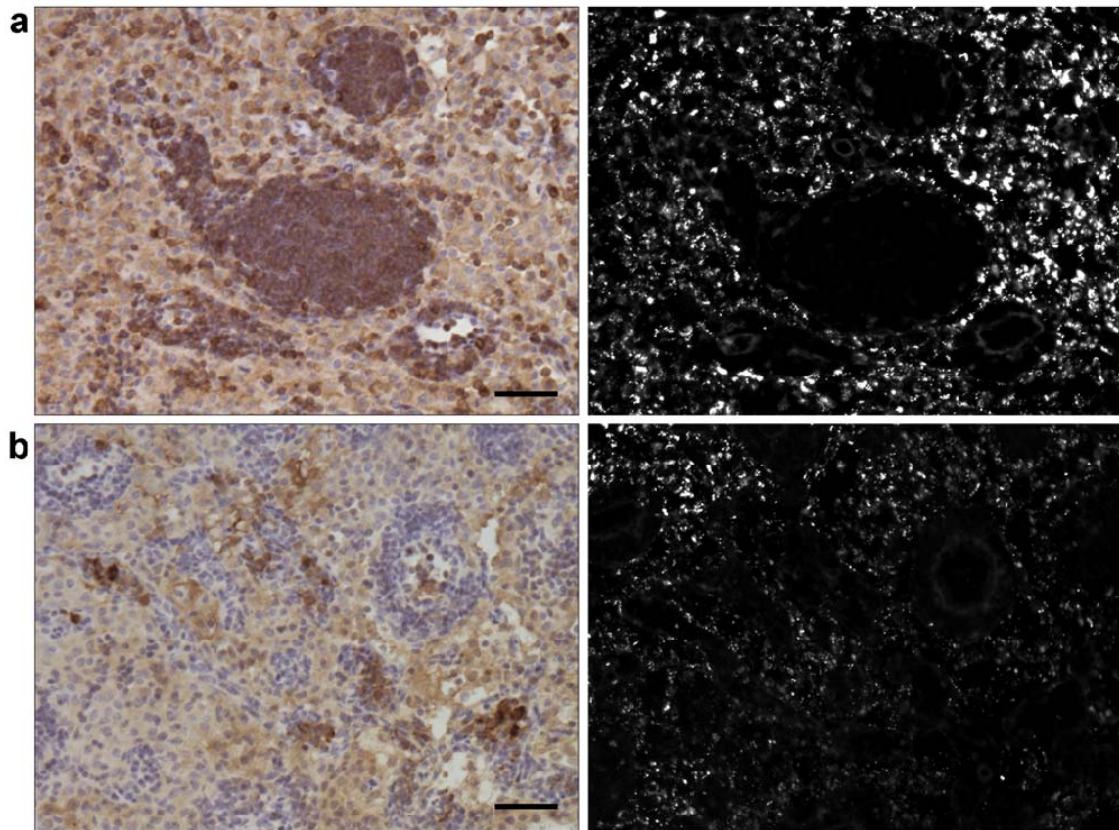

**Figure S4**

Immuno-histochemically CD3- (a) and CD20-stained (b) images (Diaminobenzidine; DAB) and fluorescence images of Qdots are shown. The majority of Qdots are located in the lymphatic sinus. Scale bars = 50  $\mu\text{m}$ .

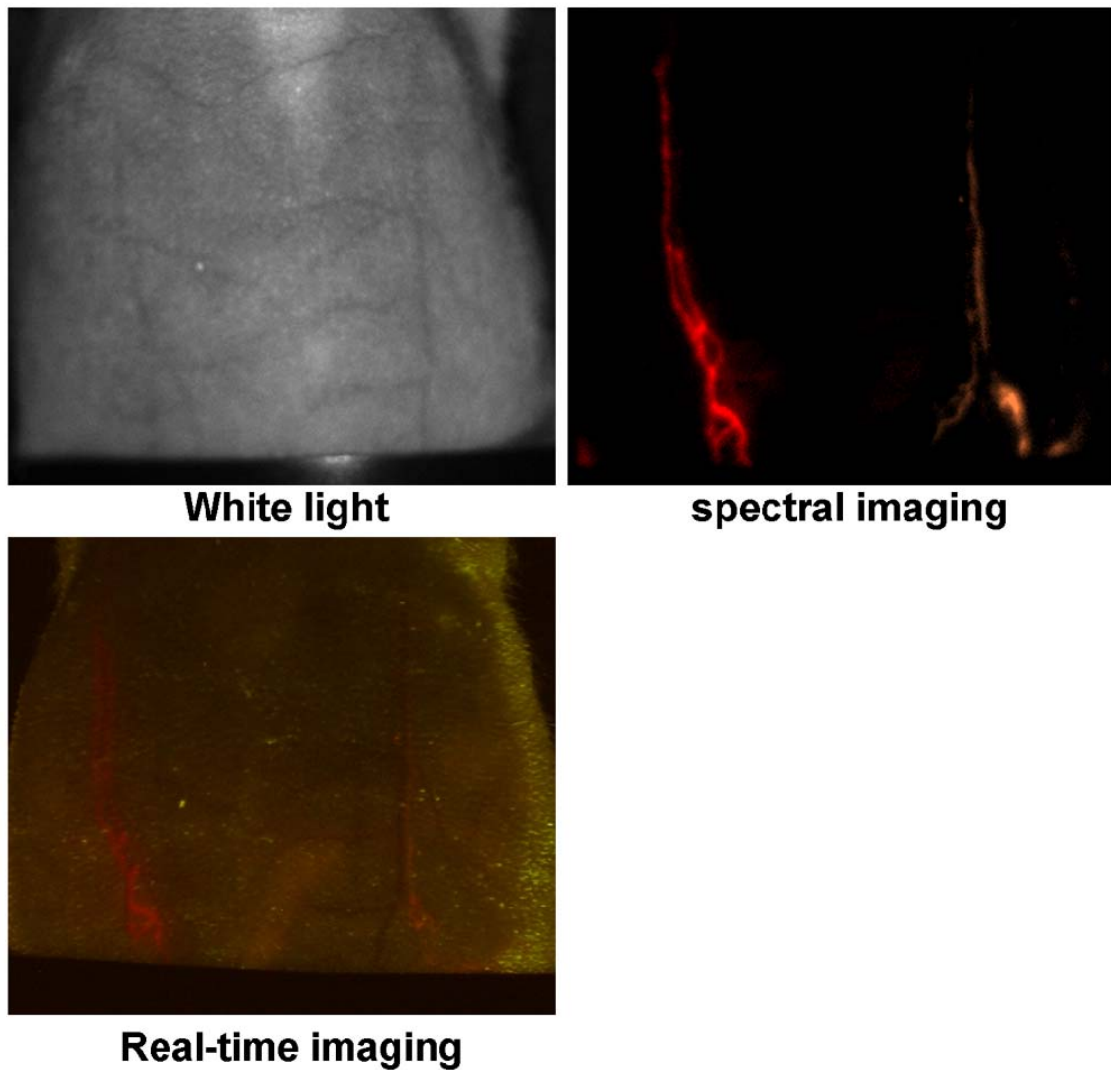

**Figure S5**

Two different Qdot solutions (Qdot 585 and 655) were intradermally injected into right and left lower abdominal wall separately. *In vivo* fluorescence images of abdominal wall shows two difference lymphatic drainages in different colors. Injection sites were covered by black tapes.
